# Supplementary material
Source: PubMed Central journal article supplement (PMC3116437)
Supplement: 1017548108_pnas.201017548SI.pdf [file 1017548108_pnas.201017548SI.pdf]

# Supporting Information

## Swarup and Verheyen 10.1073/pnas.1017548108

### SI Experimental Procedures

**Drosophila Genetics.** All crosses were performed according to standard procedures at 25 °C. Fly strains used in this study were *en-Gal4 UAS-GFP*, *ap-Gal4*, *omb-Gal4*, *UAS-flp*, *ey-FLP*, *dpp-lacZ*, *w<sup>1118</sup>* (as wild type) (Bloomington *Drosophila* Stock Center), *UAS-hipk* (II), *UAS-hipk* (III) (1), *UAS-hipk<sup>RNAi</sup>* (II), *UAS-hipk<sup>RNAi</sup>* (III) (Vienna *Drosophila* RNAi Center), *slimb<sup>P1493</sup>*, *FRT82* (2), *UAS-Daxin<sup>A2-4</sup>* (3), *UAS-FLAG-Dcull* (4), *UAS-slimb* (5), *Tub > Myc-Slimb* (6), *hipk<sup>4</sup> FRT79* (7), *Daxin<sup>S044230</sup> FRT82/TM6B* (8), *Dcull<sup>EX</sup> FRT40* (9). In assays examining the interaction between two *UAS* transgenes, control crosses were performed with *UAS-lacZ* to rule out suppressive effects caused by titration of the Gal4 protein. MARCM clones were generated by crossing *y w hsflp UAS-GFP tubGal4; FRT42D tubGal80; + or y*

*w hsflp UAS-GFP tubGal4; +; FRT82B tubGal80* (gift from Bruce Edgar) females to males of the particular genotype for 24 h and the progeny were then heat-shocked at 38 °C for 90 min at 48 h AEL. Loss-of-function clones for *hipk* in the wing disk were generated by crossing *omb-Gal4/FM7; hipk<sup>4</sup> FRT79/TM6B* females to *UAS-flp; GFP, FRT79/TM6B* males.

**DNA Constructs.** The following plasmids were used in this study: pUAST-Hipk (1), pGEX-GST-Hipk (10), pMK33-HA-Sgg (11), pMK33-HA-CK1 (12),  $\beta$ -TrCP-Myc-pCS2+ (13), pCDNA3-Hipk2<sup>WT</sup>-FLAG and pCDNA3-Hipk2<sup>K221R</sup>-FLAG (14), pCDNA3-Myc-Ubiquitin (15), pDA-FLAG-Ci, pDA-FLAG-Hh-N, pDA-RL (16), ptc $\Delta$ 136-Luc and ptc $\Delta$ 136-mut (17).

1. Lee W, Swarup S, Chen J, Ishitani T, Verheyen EM (2009) Homeodomain-interacting protein kinases (Hipks) promote Wnt/Wg signaling through stabilization of beta-catenin/Arm and stimulation of target gene expression. *Development* 136:241–251.
2. Jiang J, Struhl G (1998) Regulation of the Hedgehog and Wingless signalling pathways by the F-box/WD40-repeat protein Slimb. *Nature* 391:493–496.
3. Willert K, Logan CY, Arora A, Fish M, Nusse R (1999) A *Drosophila* Axin homolog, Daxin, inhibits Wnt signaling. *Development* 126:4165–4173.
4. Wu JT, Lin HC, Hu YC, Chien CT (2005) Neddylation and deneddylation regulate Cul1 and Cul3 protein accumulation. *Nat Cell Biol* 7:1014–1020.
5. Grima B, et al. (2002) The F-box protein slimb controls the levels of clock proteins period and timeless. *Nature* 420:178–182.
6. Ko HW, Jiang J, Ederly I (2002) Role for Slimb in the degradation of *Drosophila* Period protein phosphorylated by Doubletime. *Nature* 420:673–678.
7. Lee W, Andrews BC, Faust M, Walldorf U, Verheyen EM (2009) Hipk is an essential protein that promotes Notch signal transduction in the *Drosophila* eye by inhibition of the global co-repressor Groucho. *Dev Biol* 325:263–272.
8. Hamada F, et al. (1999) Negative regulation of Wingless signaling by D-axin, a *Drosophila* homolog of axin. *Science* 283:1739–1742.
9. Ou CY, Lin YF, Chen YJ, Chien CT (2002) Distinct protein degradation mechanisms mediated by Cul1 and Cul3 controlling Ci stability in *Drosophila* eye development. *Genes Dev* 16:2403–2414.
10. Choi CY, et al. (2005) Phosphorylation by the DHPK2 protein kinase modulates the corepressor activity of Groucho. *J Biol Chem* 280:21427–21436.
11. Yanagawa S, et al. (1997) Accumulation of Armadillo induced by Wingless, Dishevelled, and dominant-negative Zeste-White 3 leads to elevated DE-cadherin in *Drosophila* clone 8 wing disc cells. *J Biol Chem* 272:25243–25251.
12. Yanagawa S, et al. (2002) Casein kinase I phosphorylates the Armadillo protein and induces its degradation in *Drosophila*. *EMBO J* 21:1733–1742.
13. Liu C, et al. (1999) beta-Trcp couples beta-catenin phosphorylation-degradation and regulates *Xenopus* axis formation. *Proc Natl Acad Sci USA* 96:6273–6278.
14. D'Orazi G, et al. (2002) Homeodomain-interacting protein kinase-2 phosphorylates p53 at Ser 46 and mediates apoptosis. *Nat Cell Biol* 4:11–19.
15. Kanei-Ishii C, et al. (2004) Wnt-1 signal induces phosphorylation and degradation of c-Myb protein via TAK1, HIPK2, and NLK. *Genes Dev* 18:816–829.
16. Fukumoto T, Watanabe-Fukunaga R, Fujisawa K, Nagata S, Fukunaga R (2001) The fused protein kinase regulates Hedgehog-stimulated transcriptional activation in *Drosophila* Schneider 2 cells. *J Biol Chem* 276:38441–38448.
17. Chen CH, et al. (1999) Nuclear trafficking of Cubitus interruptus in the transcriptional regulation of Hedgehog target gene expression. *Cell* 98:305–316.

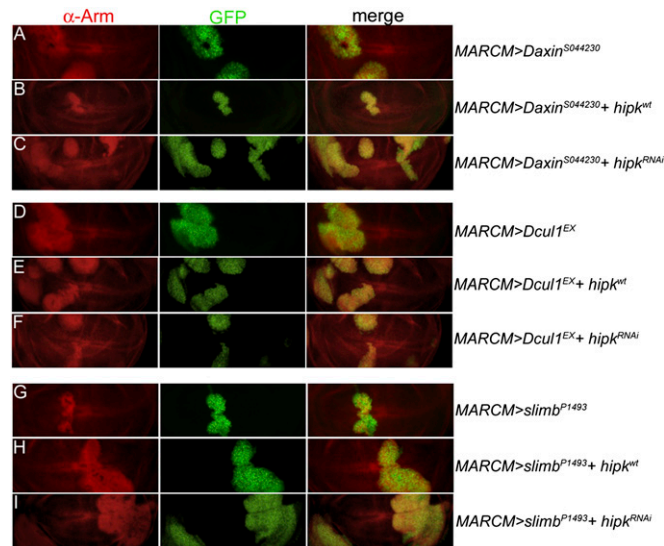

**Fig. S1.** Modulation of *hipk* has no effect on completely stabilized Arm. (A) The generation of positively GFP-marked loss-of-function MARCM clones for *Daxin* prevents the degradation of Arm and stabilizes the entire cytosolic pool. Once all cytosolic Arm is completely stabilized, the effects of overexpression of *hipk* (B) or *hipk<sup>RNAi</sup>* (C) in this background are negligible. (D) Loss-of-function clones for *Dcul1* also stabilizes all cytosolic Arm anywhere in the wing disk. Overexpression of *hipk* (E) or *hipk<sup>RNAi</sup>* (F) in this context does not enhance or decrease the levels of stabilized Arm. (G) Similar to *Daxin* and *Dcul1*, loss-of-function clones for *slimb* result in the complete stabilization of Arm anywhere in the wing disk, which is affected by neither an increase (H) nor a decrease (I) in Hipk levels.

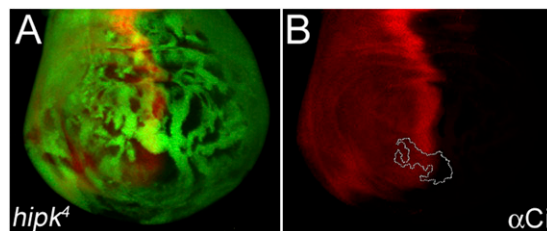

**Fig. S2.** Full-length Ci is reduced in loss-of-function clones for *hipk* in the wing disk. (A and B) Clonal analysis of *hipk* (indicated by a loss of GFP) shows a reduction in full-length Ci in certain parts of the wing disk.
